## Review

# NHE<sub>VNAT</sub>: an H<sup>+</sup> V-ATPase electrically coupled to a Na<sup>+</sup>:nutrient amino acid transporter (NAT) forms an Na<sup>+</sup>/H<sup>+</sup> exchanger (NHE)

William R. Harvey<sup>1,2,\*</sup>, Dmitri Y. Boudko<sup>1,†</sup>, Mark R. Rheault<sup>1,‡</sup> and Bernard A. Okech<sup>1,2</sup>

<sup>1</sup>Whitney Laboratory for Marine Bioscience, University of Florida, 9505 Ocean Shore Boulevard, St Augustine, FL 32080, USA and

<sup>2</sup>Department of Physiology and Functional Genomics, Department of Epidemiology and Biostatistics and Emerging Pathogens Institute, University of Florida, Gainesville, FL 32610, USA

\*Author for correspondence (e-mail: wharvey@whitney.ufl.edu)

†Present address: Department of Physiology and Biophysics Rosalind Franklin University of Medicine and Science, 3333 Green Bay Road, North Chicago, IL 60064, USA

‡Present address: Department of Biology and Physical Geography, University of British Columbia, Okanagan, 3333 Kelowna, BC, Canada, V1V 1V7

Accepted 19 November 2008

### Summary

Glycolysis, the citric acid cycle and other metabolic pathways of living organisms generate potentially toxic acids within all cells. One ubiquitous mechanism for ridding cells of the acids is to expel H<sup>+</sup> in exchange for extracellular Na<sup>+</sup>, mediated by electroneutral transporters called Na<sup>+</sup>/H<sup>+</sup> exchangers (NHEs) that are driven by Na<sup>+</sup> concentration gradients. The exchange must be important because the human genome contains 10 NHEs along with two Na<sup>+</sup>/H<sup>+</sup> antiporters (NHAs). By contrast, the genomes of two principal disease vector mosquitoes, *Anopheles gambiae* and *Aedes aegypti*, contain only three NHEs along with the two NHAs. This shortfall may be explained by the presence of seven nutrient amino acid transporters (NATs) in the mosquito genomes. NATs transport Na<sup>+</sup> stoichiometrically linked to an amino acid into the cells by a process called symport or co-transport. Three of the mosquito NATs and two caterpillar NATs have previously been investigated after heterologous expression in *Xenopus laevis* oocytes and were found to be voltage driven (electrophoretic). Moreover, the NATs are present in the same membrane as the H<sup>+</sup> V-ATPase, which generates membrane potentials as high as 120 mV. We review evidence that the H<sup>+</sup> V-ATPase moves H<sup>+</sup> out of the cells and the resulting membrane potential ( $V_m$ ) drives Na<sup>+</sup> linked to an amino acid into the cells via a NAT. The H<sup>+</sup> efflux by the V-ATPase and Na<sup>+</sup> influx by the NAT comprise the same ion exchange as that mediated by an NHE; so the V and NAT working together constitute an NHE that we call NHE<sub>VNAT</sub>. As the H<sup>+</sup> V-ATPase is widely distributed in mosquito epithelial cells and there are seven NATs in the mosquito genomes, there are potentially seven NHE<sub>VNAT</sub>s that could replace the missing NHEs. We review published evidence in support of this hypothesis and speculate about broader functions of NHE<sub>VNAT</sub>s.

Key words: electrogenic, electrophoretic, KAAT1, CAATCH1, AeAAT1i, AgNAT8.

### Introduction

How cells get rid of metabolically produced acids has been an intriguing question for more than half a century. Murer and colleagues first reported a Na<sup>+</sup>/H<sup>+</sup> antiport in brush-border membrane vesicles (BBMV) from rat small intestine and kidney (Murer et al., 1976). Pouyssegur and associates cloned the first Na<sup>+</sup>/H<sup>+</sup> exchanger (NHE) from a human cDNA collection (Sardet et al., 1989). Presently, the ability to eject cellular H<sup>+</sup> by exchange with external Na<sup>+</sup> mediated by NHEs is thought to occur in all eukaryotic cells. The energy for the exchange is furnished by ATP hydrolysis and is mediated by the Na<sup>+</sup>/K<sup>+</sup> P-ATPase, which typically is located on the cell's basolateral membrane where it expels Na<sup>+</sup>, keeping the cell Na<sup>+</sup> concentration low. NHE is also located on the cell's basolateral membrane in mammals where it uses the large Na<sup>+</sup> gradient to import Na<sup>+</sup> and export H<sup>+</sup>. The stoichiometry of the exchange is: 1 Na<sup>+</sup> in, 1 H<sup>+</sup> out, so NHE is electroneutral and the only force driving the cation exchange is the Na<sup>+</sup> concentration gradient (Orlowski and Grinstein, 2004).

Gill and associates (Pullikuth et al., 2006) cloned the Na<sup>+</sup>/H<sup>+</sup> exchanger 2 from *Aedes aegypti* (AeNHE2) (AeNHE3 in their terminology) and characterized it heterologously in yeast cells where it complements mutants deficient in certain NHEs; they also

expressed it in NHE-deficient fibroblast cells where it enabled the recovery of intracellular pH following an acid load. In mosquitoes, AeNHE2 is located on the basal membranes of Malpighian tubules and midgut cells where it appears to play a role in pH regulation. More recently, Kang'ethe, Gill and associates (Kang'ethe et al., 2007) cloned the Na<sup>+</sup>/H<sup>+</sup> exchanger 1 from *Ae. aegypti* (AeNHE1) (AeNHE8 in their terminology). When heterologously expressed in NHE-deficient yeast cells, it restored the ability to grow in high NaCl medium. In proteoliposomes carrying yeast membranes, it mediated the exchange of Na<sup>+</sup> or K<sup>+</sup> for H<sup>+</sup>. In mosquito adults, it was localized to the apical plasma membranes in Malpighian tubules, gastric caeca (GC) and the rectum. Gill's group proposed that in Malpighian tubules, AeNHE1 couples the inward H<sup>+</sup> gradient created by the H<sup>+</sup> V-ATPase to extrude excess Na<sup>+</sup> and K<sup>+</sup> 'while maintaining steady intracellular pH in the principal cells'.

An entirely different mechanism for Na<sup>+</sup>/H<sup>+</sup> exchange between cells and lumen involves the interaction between two membrane proteins: (1) an H<sup>+</sup> V-ATPase that translocates H<sup>+</sup> across the lipid bilayer toward the lumen and generates a transmembrane voltage (lumen positive); and (2) a voltage-driven, (Na<sup>+</sup> or K<sup>+</sup>)-coupled nutrient amino acid transporter (NAT) that moves Na<sup>+</sup> linked to an amino acid into the cells. A much-studied example is the symport

of essential amino acids from the midgut lumen into the epithelial cells of caterpillars. Nedergård first demonstrated active amino acid uptake by the isolated caterpillar midgut and showed that it is voltage dependent (Nedergård, 1972a). Hanozet, Giordana and Sacchi (Hanozet et al., 1980) demonstrated  $K^+$ :amino acid symport in BBMV from wild silkworm midgut and initiated a series of studies that culminated in the identification of six  $K^+$ -coupled amino acid uptake systems (Giordana et al., 1989). Meanwhile, Ramsay, Harvey, Gupta and Berridge, and Maddrell and others had identified and characterized a so-called electrogenic  $K^+$ -pump, and Cioffi, Wolfersberger and Harvey had isolated the goblet cell apical membrane (GCAM) in which the  $K^+$ -pump resides and showed that it is an ATPase [Harvey et al. (Harvey et al., 1983) and references therein]. Wiczorek, Klein and associates solubilized the GCAM ATPase and showed that it is an  $H^+$  V-ATPase (Wiczorek et al., 1989). It is now clear that all  $H^+$  V-ATPases are electrogenic membrane energizers that hyperpolarize the membranes in which they reside (reviewed by Nelson and Harvey, 1999).

Recall that the V-ATPase moves  $H^+$  from cell to lumen and the NAT moves  $Na^+$  from lumen to cell, like classical NHEs. Research has focused on the uptake of amino acids rather than  $Na^+$  and no one recognized this new, electrically coupled method for  $Na^+/H^+$  exchange until Harvey, Okech and associates brought attention to it (Okech et al., 2008a). They noted the location of the  $H^+$  V-ATPase and a  $Na^+$ :amino acid transporter (*AgNAT8*) together on the apical plasma membrane of the epithelial cells in GC and posterior midgut (PMG) of *Anopheles gambiae* larvae. They deduced that the  $H^+$  V-ATPase, *AgNAT8* pair acts like an NHE and suggested the term  $NHE_{VNAT}$ . Critics objected that the deduction is too obvious and that the term is unnecessary. We counter that a phenomenon that had remained unrecognized for a quarter of a century deserves a name. To quote the closing line in Peter Mitchell's 1978 Nobel lecture 'The obscure we see eventually, the completely apparent takes longer'. No one doubts that  $H^+$  V-ATPases are voltage-generating (electrogenic)  $H^+$  exporters. We will review the evidence that many amino acid transporters are voltage-driven (electrophoretic)  $Na^+$  or  $K^+$  importers.

### Review and perspective

#### General principles of electrophoretic transporters

Many secondary solute transporters are electrophoretic. Electrical coupling between membrane proteins is a topic that is seldom discussed. For one thing, the terminology is confusing. Transporters that generate electricity under laboratory conditions are usually electrically driven in living organisms, so they are electrophoretic not electrogenic. As the literature on solute transporters grows, the distinction between proteins that generate membrane potentials ( $V_m$ ) and those that use the potentials to drive solute transport becomes more important. For example, the  $H^+$  V-ATPase of eukaryotes is purely electrogenic – its sole action is to translocate  $H^+$  across a membrane's dielectric lipid bilayer and charge its capacitance, resulting in a  $V_m$ . Whether the output side is acidified, remains pH neutral or is alkalized depends upon other components in the membrane, thus:  $V_m$  could drive  $Cl^-$  through a  $Cl^-$  channel and acidify the output compartment;  $V_m$  could not affect an electroneutral NHE or the pH but  $V_m$  could drive the co-transport of  $Na^+$  linked to an amino acid away from the lumen *via* an electrophoretic symporter – the replacement of  $Na^+$  by  $H^+$  from the ATPase would tend to acidify the lumen (Harvey, 1992). For example *AgNAT8* is an insect symporter that uses the  $V_m$  generated by an  $H^+$  V-ATPase to drive  $Na^+$  stoichiometrically linked to phenylalanine or tyrosine into cells (Meleshkevitch et al., 2006).

The  $H^+$  that had been translocated across the lipid bilayer by the V-ATPase would replace the  $Na^+$  in the lumen and the pH would change in the acid direction. Insects often use  $K^+$  rather than  $Na^+$  during secondary transport but we will retain terms like NHE,  $Na^+/H^+$  antiporters (NHA),  $Na^+$ :amino acid symport, understanding that  $K^+$  is often substituted.

#### Voltages vs concentration gradients as membrane energizers

The voltage gradients across biomembranes are enormous. For example, in the caterpillar midgut the phosphorylation potential is ~240 mV (Mandel et al., 1975) and voltages nearly equal to this amount were reported by Dow and Peacock (Dow and Peacock, 1989). This value is 3–4 times the  $V_m$  commonly reported across the majority of animal plasma membranes and nearly double the voltage observed across the mitochondrial inner membrane. 240 mV is equivalent to a 10,000-fold concentration gradient across a membrane for a monovalent ion such as  $Na^+$ . In mosquito midgut, the potential difference may be ~120 mV, which is equivalent to a 100-fold concentration gradient for a monovalent ion. Thus, the voltage gradients generated by  $H^+$  V-ATPase membrane energization are enormous and to ignore them is to miss a large part of membrane biology.

#### Essential amino acids require membrane proteins to enter cells

Between 10 and 12 amino acids cannot be synthesized within most metazoan cells and must be taken up from the diet. As amino acids are polar and charged, they cannot simply diffuse across the lipid bilayer of plasma membranes and several classes of membrane transport proteins that mediate their movements have evolved. Membrane proteins that facilitate the diffusion of amino acids down their own electrochemical gradients are called uniporters. Those that mediate ion uptake stoichiometrically linked to solute uptake are called co-transporters by vertebrate physiologists and symporters by those who work on insects or prokaryotes. A symporter can be  $Na^+$  or  $K^+$  concentration gradient driven, or voltage driven. In marine animals and their descendants,  $Na^+$  is the common coupling ion but in caterpillars and fresh water dwellers, such as mosquitoes,  $K^+$  may be the preferred ion.

#### Basal and lateral vs basolateral membranes in insect epithelia

Vertebrate epithelial cells are characteristically joined by tight junctions that define two compartments – a luminal compartment outside the apical membrane and an extracellular fluid compartment outside the basolateral membrane. Insect epithelial cells have a series of septate junctions (Oschman and Berridge, 1971) that hold the cells together all along their lateral surfaces and define a lateral membrane. Separate lateral membranes were isolated from basal membranes (Cioffi and Wolfersberger, 1983) and exhibited distinct patterns on SDS gels (Wiczorek et al., 1990). Accordingly, we will use the terms apical, lateral and basal membranes.

#### Early studies on caterpillar amino acid transport

##### Electrophoretic amino acid uptake in caterpillars

From the outset it was clear that amino acid uptake in the isolated midgut of caterpillars is voltage dependent (Nedergård, 1972a; Nedergård, 1972b). By the 1990s several major amino acid transport systems had been characterized in BBMV from lepidopteran midgut, including, but not limited to, *Philosamia cynthia* (Hanozet et al., 1980; Giordana et al., 1982; Giordana and Parenti, 1994), *M. sexta* (Hennigan et al., 1993b; Hennigan et al., 1993a; Reuveni et al., 1993; Bader et al., 1995; Liu and Harvey,



synthesized within cells. Nevertheless, specific transporters for non-essential amino acids, which are important for neurotransmission and many metabolic pathways, have evolved (Boudko et al., 2005b).

The major energizer of solute transport in the midgut epithelium of mosquito larvae is ATP hydrolysis by the proton-translocating ( $H^+$ ) V-ATPase. This primary pump is highly expressed in GC and PMG epithelial cells of *Ae. aegypti* larvae where it is localized in the apical plasma membranes (Patrick et al., 2006; Zhuang et al., 1999). It is thought to drive ion-coupled, electrophoretic amino acid uptake from ectoperitrophic space to cells. The  $Na^+/K^+$ -ATPase also plays a prominent role in larval mosquito membrane energization (Patrick et al., 2006); the default condition seems to be that  $H^+$  V-ATPases energize apical membranes and  $Na^+/K^+$ -ATPases energize basal membranes. However,  $H^+$  V-ATPase is in the basal membrane in larval *Ae. aegypti* anterior midgut (AMG) (Zhuang et al., 1999) and  $Na^+/K^+$ -ATPase is in the apical membrane (Patrick et al., 2006), as they are in *An. gambiae* larvae (Okech et al., 2008a).

#### Cloning in the pre-genomic era: *MsKAAT1*, *MsCAATCH1* and *AeAAT1i*

Although Guastella and colleagues had cloned the  $\gamma$ -amino butyric acid (GABA) transporter (*GAT1*) in 1990 (Guastella et al., 1990), it was not until 1998 that  $K^+$  amino acid transporter 1 (*KAAT1*) (Fig. 1), the first metazoan, nutrient  $\alpha$ -amino acid transporter, was cloned and characterized (Castagna et al., 1998). *KAAT1* was cloned by RNA size-fractionation/expression in *Xenopus laevis* oocytes that had been injected with cRNA from *Manduca sexta* midgut. *KAAT1* has 634 amino acid residues with 12 putative membrane spanning domains (Fig. 1) and shows a low level of identity with members of the  $Na^+$ - and  $Cl^-$ -coupled neurotransmitter transporter (NTT) family. To identify the amino acid binding sites several mutations that had been identified in the GABA transporter (*GAT1*) were made (Fig. 1, blue shading). Mutating tyrosine 147 to phenylalanine (yellow shading) increased labeled leucine uptake by *Xenopus* oocytes in  $Na^+$  buffer by seven-fold whereas mutation of the equivalent site, Y140 in *GAT1*, led to complete loss of activity (Liu et al., 2003). Further mutations of amino acid residues in *M. sexta*  $K^+$  amino acid transporter 1 (*MsKAAT1*) have been analyzed by the Italian workers (references listed below).

*In situ* hybridization revealed that *KAAT1* cRNA is transcribed in labial glands and in absorptive columnar cells of the caterpillar

midgut where  $K^+$  is the principal cation. Its kinetic properties are similar to those of neutral amino acid transport systems in BBMV from this caterpillar (Wolfersberger, 2000). The cation dependency, amino acid uptake activity and kinetic properties of *KAAT1* have subsequently been studied by many workers (e.g. Bossi et al., 1999a; Bossi et al., 1999b; Bossi et al., 2000; Peres and Bossi, 2000; Vincenti et al., 2000; Castagna et al., 2002; Liu et al., 2003).

*CAATCH1* is a substrate-gated ion channel and an ion-gated transporter

A second amino acid transporter, cation anion activated amino acid transporter channel (*CAATCH1*) was cloned by Feldman and colleagues from *M. sexta* (Feldman et al., 2000). When expressed in *Xenopus* oocytes in the presence of L-proline, L-threonine or L-methionine, *CAATCH1* exhibited an inverted U-shaped current-voltage relationship, which is characteristic of the ion-gated transporters of dopamine, serotonin and norepinephrine in the presence of cocaine or antidepressants. The sharply increasing current with increasingly negative voltages shows that *CAATCH1* is electrophoretic (Feldman et al., 2000). However, unlike other sodium neurotransmitter symporter family (SNF) transporters, *CAATCH1* activity is independent of  $Cl^-$ . Its substrate-associated currents resemble those of *KAAT1* in that it is an alkali cation-activated, voltage-dependent, nutrient amino acid carrier. However, unlike *KAAT1*, *CAATCH1* possesses a methionine-inhibitable leakage current and has a variable narrow substrate selectivity, preferring threonine in the presence of  $K^+$  but proline in the presence of  $Na^+$ . *CAATCH1* is pH dependent, its activity increasing to at least pH 9.5 in oocyte membranes. The activity of *CAATCH1* heterologously expressed in *Xenopus* oocytes is similar to that *in vivo* where the transapical voltage is  $-240$  mV and the pH is  $>10$ . Soragna and colleagues studied differences in amplitude, kinetics and voltage dependence of transport-associated currents between *KAAT1* and *CAATCH1* (Soragna et al., 2004). They constructed four chimeric proteins between the two transporters, expressed them in *Xenopus* oocytes and analyzed them by two-electrode voltage clamp and tracer uptake experiments. Analysis of the data from the four chimeras revealed that only central membrane domains were responsible for selectivity. Quick and Stevens studied the relationship between amino acid transport and amino acid-gated ion fluxes (pre-steady state transient and steady state currents) mediated by *CAATCH1* expressed in *Xenopus*

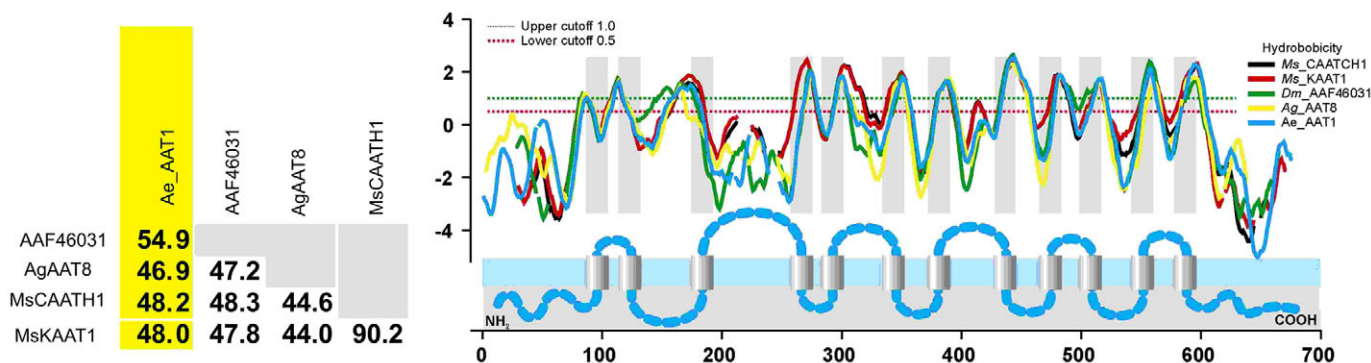

Fig. 2. Characteristics of *Aedes aegypti* amino acid transporter 1 (*AeAAT1i*). Reciprocal amino acid sequence identity matrix (left); hydropathy plot and predicted transmembrane topology (right); TopPed II parameters were: GES-hydrophobicity scales: 1.0 upper and 0.5 lower cutoffs; 10 and 5; core and wage window sizes, 60; critical loop length, 2 for critical transmembrane spacer. Hydropathy values (vertical scale) and distribution of transmembrane spanning domain (insert) are aligned relative to amino acid position (horizontal scale). (Modified from Boudko et al., 2005a.)

oocytes (Quick and Stevens, 2001). Simultaneous tracer flux and electrical current measurements showed that cation and amino acid transport events are thermodynamically uncoupled. Quick and Stevens concluded that CAATCH1 is a multi-function membrane protein, which acts primarily as an amino acid-gated alkali cation channel but it also mediates thermodynamically uncoupled amino acid uptake (Quick and Stevens, 2001).

*AeAAT1* was the first mosquito nutrient amino acid transporter to be cloned  
 Amino acid transporter 1 (*AeAAT1i*) was cloned by a PCR procedure from a PMG cDNA collection of *Ae. aegypti* larvae (Fig.2). It is a 678 residue polypeptide with high amino acid sequence identity to *MsKAAT1*, *M. sexta* cation anion activated amino acid transporter channel (*MsCAATCH1*), *AgNAT8*

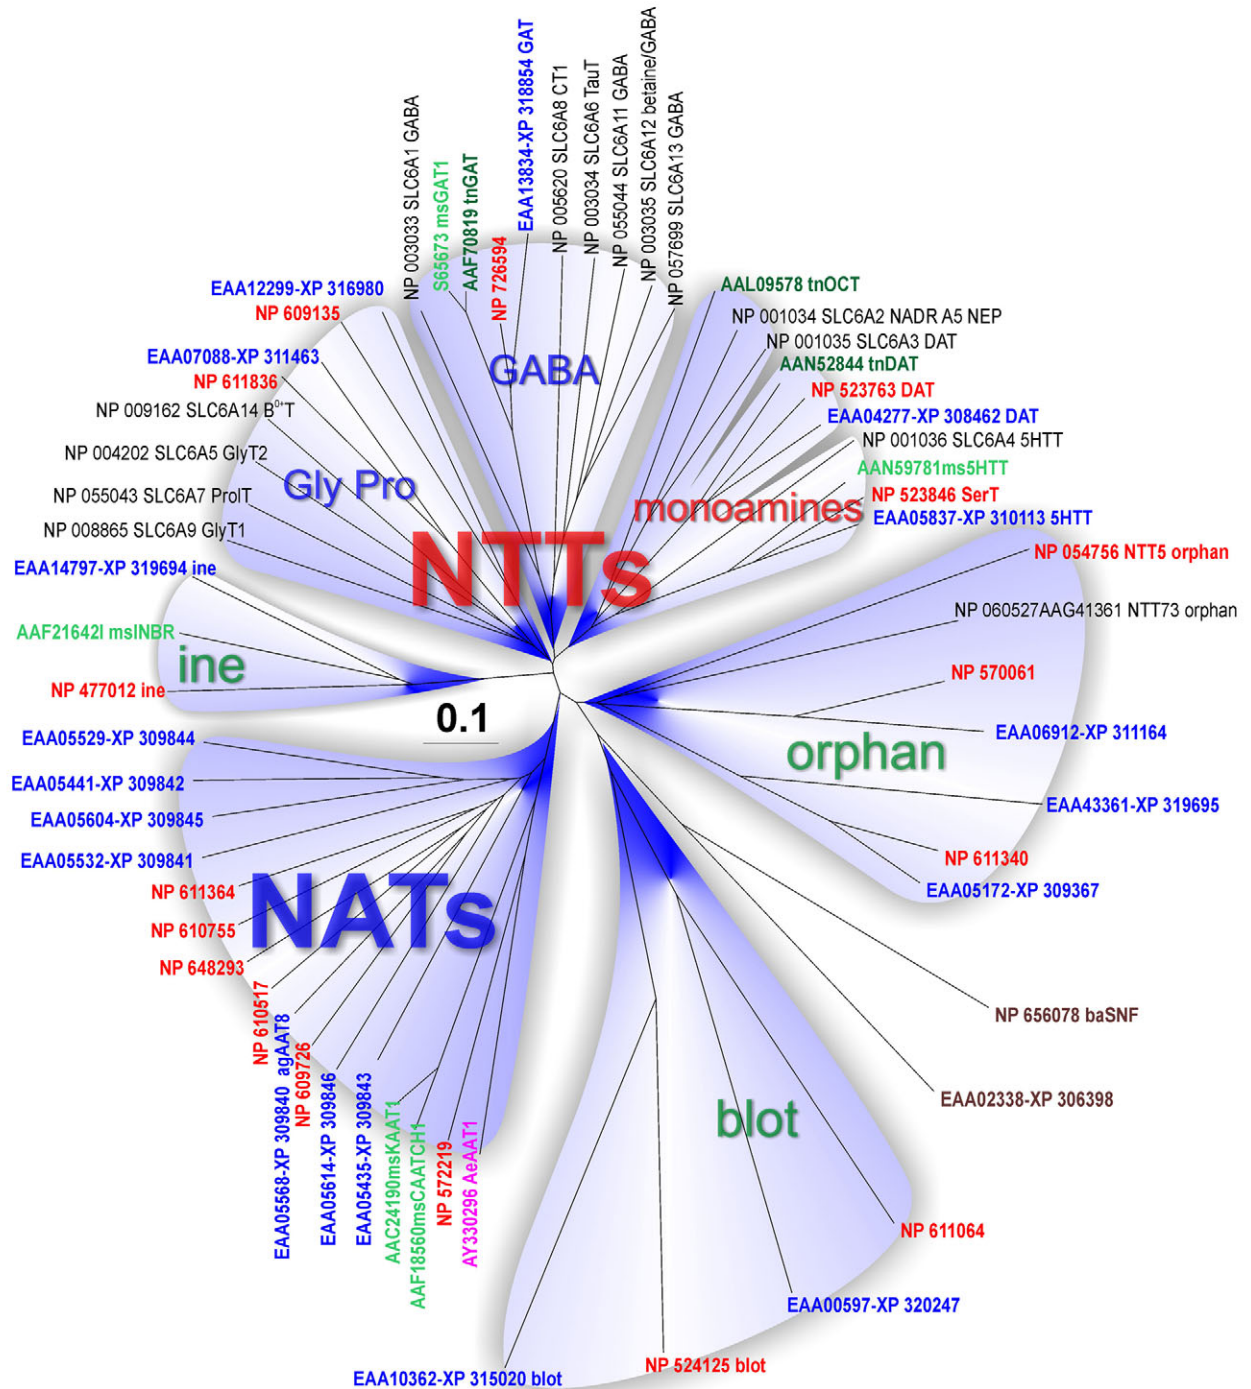

Fig.3. Phylogram of sodium neurotransmitter symporter family (SNF) showing the relationship of nutrient amino acid transporters (NATs) to neurotransmitter transporters (NTTs). NATs are Na<sup>+</sup>-coupled amino acid\* (neutral amino acid) symporters. Accession numbers for the seven *Anopheles gambiae* NATs are shown in blue font (Boudko et al., 2005b).

(Meleshkevitch et al., 2006) and a putative gene product from *D. melanogaster* (Fig. 2, left). *AeAAT1* has 12 transmembrane sectors at positions similar to those in *MsKAAT1* and *MsCAATCH1* (Fig. 2, right). When heterologously expressed in *Xenopus* oocytes, the amino acid-induced inward currents were Na<sup>+</sup> dependent but were K<sup>+</sup> and Cl<sup>-</sup> independent. Nevertheless, K<sup>+</sup> and Cl<sup>-</sup> modified the response kinetics and *I/V* dependency of the transporter. The amplitude of the ligand-induced currents depended upon pH and transmembrane voltage. The transport showed saturable kinetics for both Na<sup>+</sup> and amino acid with apparent *K<sub>m</sub>* of 0.45±0.05 and 37.65±2.12 mmol l<sup>-1</sup>, and Hill coefficients 1.04±0.08 and 2.05±0.23 for phenylalanine and Na<sup>+</sup>, respectively. These data suggest that

*AeAAT1i* is an electrophoretic transporter with stoichiometry 1(amino acid):2(Na<sup>+</sup>).

Cloning in the post-genomic era

NTTs and NATs from genomic mosquitoes

The SNF (also known as SLC6 or HUGO) is one of the largest, most ancient and most diverse families of secondary transporters. Members of its neurotransmitter transporter (NTT) subfamily mediate absorption of neurotransmitters: dopamine, norepinephrine, epinephrine, octopamine, serotonin, GABA; putative neuromodulators (glycine and proline) intracellular osmolytes (taurine and betaine) intracellular energy substrates

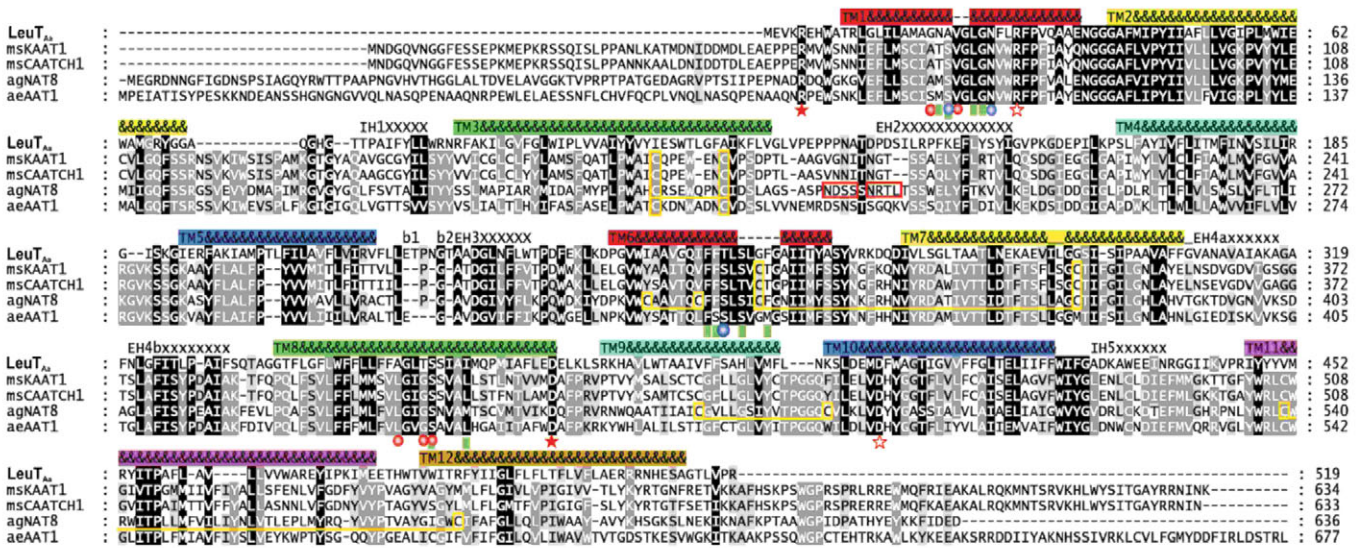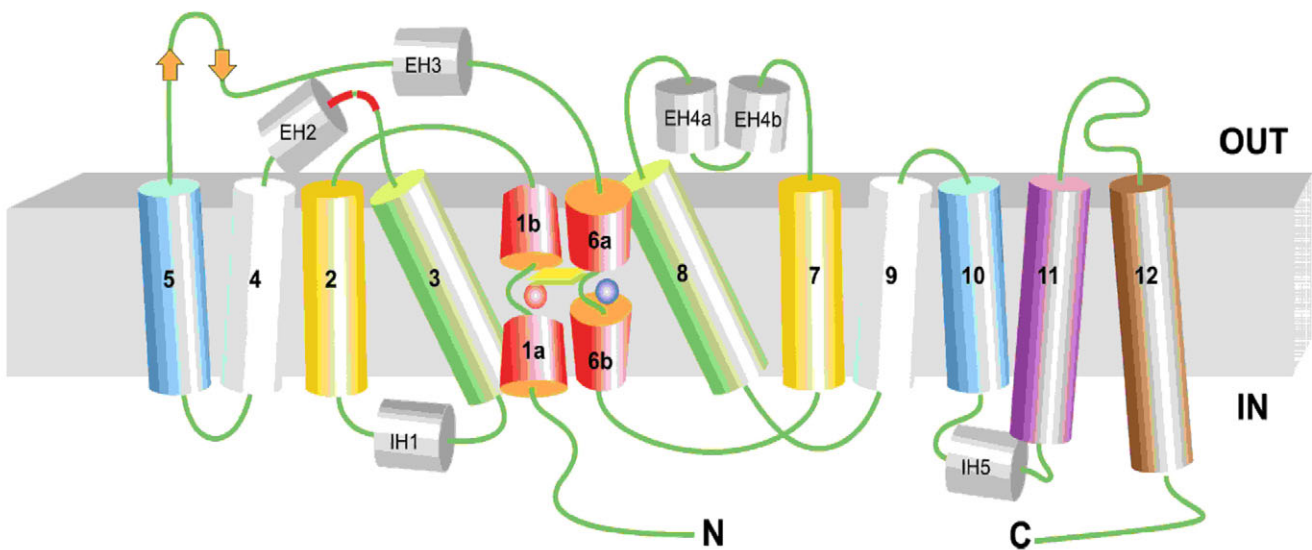

Fig. 4. Alignment and reconstruction of *Anopheles gambiae* nutrient amino acid transporter 8 (*AgNAT8*) structure: (A) sequence/structure alignment of characterized insect transporters relative to the first crystallized bacterial nutrient amino acid transporters (NAT) from *A. aeolicus*, *LeuT*<sub>Taa</sub> (Yamashita et al., 2005). (B) 2-D structure of *AgNAT8* based on structural homology with the *LeuT*<sub>Taa</sub> protein sequence. NCBI Accession no.: *LeuT*<sub>Taa</sub>, NP\_214423 (PDB no., 2A65); *Manduca sexta* K<sup>+</sup> amino acid transporter 1 (*MsKAAT1*), AAC24190; *M. sexta* cation amino acid transporter channel 1 (*MsCAATCH1*), AAF18560; *Aedes aegypti* amino acid transporter 1 (*AeAAT1*), AAR08269; *AgNAT8*, AAN40409. Filled and open stars represent putative cationic gates at extra- and intracellular interfaces, respectively. Squares indicate putative substrate binding sites; red and blue spheres outline sites that interact with the first and second sodium ion, respectively. Red and yellow boxes show putative glycosylation motifs and disulfide bridges, respectively. The 12 transmembrane domains are numbered 1–12; from Meleshkevitch et al. (Meleshkevitch et al., 2006).

(creatine and proline) and a number of 'orphan' proteins. Several insect NTTs have been cloned, expressed in *Xenopus* oocytes and functionally characterized. The GABA transporter was cloned and localized in *M. sexta* (Mbungu et al., 1995), glutamate/aspartate transporters have been cloned from mosquito (Umesh et al., 2003) and *Trichoplusia ni* (Gao et al., 1999) central nervous systems. High-affinity, Na<sup>+</sup>-dependent glutamate transporters have been cloned from *T. ni* (Gardiner et al., 2002), from cockroach *Diploptera punctata* [excitatory amino acid transporter (EAAT1)] (Donly et al., 2000) and from *Drosophila* (Seal et al., 1998); they are similar to vertebrate neurotransmitter transporters and are predominantly localized in the brain (Donly et al., 1997).

The NAT subfamily is the largest subdivision of the SNF (Fig. 3). There are seven members of the NATs population in the African malaria mosquito, *Anopheles gambiae* [blue font in Boudko et al. (Boudko et al., 2005b)]. Two of its members have been cloned and characterized – *AgNAT8* was published two years ago (Meleshkevitch et al., 2006) and a *AgNAT6* manuscript is currently under editorial review. The synergistic localization of the two transporters was published recently (Okech et al., 2008b).

*AgNAT8* was cloned from *An. gambiae* (Meleshkevitch et al., 2006) (Fig. 4). It performs Na<sup>+</sup>-coupled nutrient absorption, preferring phenylalanine and its derivatives, tyrosine and L-DOPA (3,4-dihydroxy-L-phenylalanine). It is transcribed at specific sites in the central and peripheral neurons including visual-, chemo- and mechano-sensory afferents. It is widely transcribed in the alimentary canal where it displays alternative, apical vs basal docking in absorptive vs secretory regions. Several putative phosphorylation sites and other post-translational modification motifs are present in external loops and transmembrane domains (Fig. 4).

*AgNAT8* is electrophoretic, which is clear from the large inward current (Fig. 5) and its dependence on voltage as seen in the *I/V*

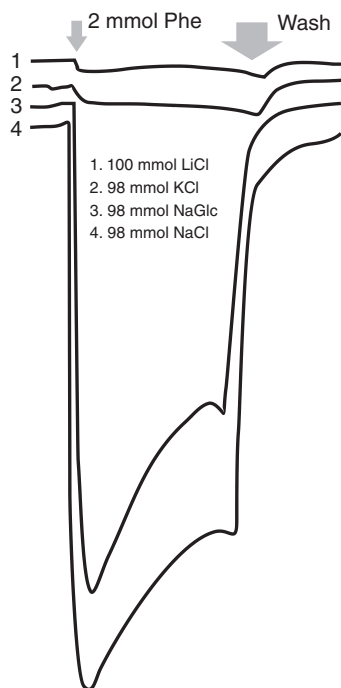

Fig. 5. When expressed in *Xenopus* oocytes *Anopheles gambiae* nutrient amino acid transporter 8 (*AgNAT8*) exhibits large inward currents showing that it is electrophoretic (Meleshkevitch et al., 2006).

plots (below). The reversible stimulation of current to >300 nA by phenylalanine in the presence of Na<sup>+</sup> confirms that *AgNAT8* is a Na<sup>+</sup>:amino acid symporter. The current is barely affected by Cl<sup>-</sup> removal but, as in *AeAAT1i*, it is abolished when Na<sup>+</sup> is replaced by either K<sup>+</sup> or Li<sup>+</sup>. The inability of K<sup>+</sup> to sustain inward currents in mosquito NATs was unexpected in light of the brush-border membrane studies on caterpillars (e.g. Giordana et al., 1998; Giordana et al., 1989; Hennigan and Wolfersberger, 1989). This difference between mosquito NATs and their caterpillar cousin, KAAT1, which prefers K<sup>+</sup> to Na<sup>+</sup>, may reflect the difference between the constantly high K<sup>+</sup>/low Na<sup>+</sup> leafy diet of caterpillars and the varied diet of mosquito larvae.

#### Synergy between *AgNAT8* and *AgNAT6*

Most recently, another new member of the NAT-SLC6 (solute carrier clade of amino acid transporters) group of the NSF has been cloned and designated, *AgNAT6* (*Anopheles gambiae* nutrient amino acid transporter 6) (E. A. Meleshkevitch, M. Robinson, L. B. Popova, M. M. Miller, W.R.H. and D.Y.B., unpublished data). This new transporter from *An. gambiae* was localized by *in situ* hybridization and by immunohistochemistry (Fig. 6) (Okech et al., 2008b). *AgNAT6* is extensively transcribed throughout the alimentary canal where its localization implies that it functions both in the primary absorption and subsequent secretion of these aromatic amino acids. It is also transcribed in specific neuronal structures, including the neuropile of ventral ganglia and sensory afferents.

The relative expression and distribution of the two aromatic NATs were examined with transporter-specific antibodies in mosquito larval alimentary canal (Okech et al., 2008b). The immunolabeling showed a strong correlation between functional expression and localization of both *AgNAT6* and *AgNAT8* in the plasma membrane of frog eggs (data not shown). Both transporters exhibited elevated expression in specific regions of the larval alimentary canal of *An. gambiae*, including salivary glands, cardia, GC, PMG and Malpighian tubules (Fig. 6). Differences in relative expression densities and spatial distribution of the transporters were prominent in virtually all of these regions suggesting unique profiles of aromatic amino acid absorption. For the first time reversal of location of a transporter between apical and basal membranes was identified in posterior and anterior epithelial domains corresponding with secretory and absorptive epithelial functions, respectively.

Okech and colleagues argued that the results suggest functional synergy between substrate-specific *AgNAT6* and *AgNAT8* in intracellular absorption of aromatic amino acids (Okech et al., 2008b). More broadly, they suggest that the specific selectivity, regional expression and polarized membrane docking of NATs represent key adaptive traits shaping functional patterns of essential amino acid absorption in the metazoan alimentary canal. Like all of the other cloned NATs, *AgNAT6* is electrogenic based on large inward currents and the voltage dependence of its *I/V* plots (E. A. Meleshkevitch, M. Robinson, L. B. Popova, M. M. Miller, W.R.H. and D.Y.B., unpublished data).

#### Electrical characterization of amino acid transporters

When expressed heterologously in *Xenopus* oocytes, KAAT1 mediated electrophoretic transport of neutral amino acids (Fig. 7). Moreover, uptake was Cl<sup>-</sup> dependent. K<sup>+</sup>, Na<sup>+</sup> and, to a lesser extent, Li<sup>+</sup> were accepted as cotransported ions. The K<sup>+</sup>/Na<sup>+</sup> selectivity increased with oocyte hyperpolarization as it does upon hyperpolarization of isolated midguts. The conductance-

increase accelerated at voltages  $>-70$  mV suggesting that KAAT1 may function as a channel at very negative potentials. All of the NATs that have been cloned to date are electrophoretic as is clear from the  $I/V$  plots (Fig. 7). The currents are always inward. *AeAAT1* is unlike other NATs in that there is no region of constant conductance. KAAT1 and *AgNAT8* show surprisingly large inward currents. The current increases in an accelerating manner with very negative voltages. These increases are not likely to be simple non-selective leaks because they appear in all four  $I/V$  plots of Fig. 7.

The importance of being electrogenic  
The  $\text{Na}^+$  gradient,  $\text{Na}^+_{\text{outside}}/\text{Na}^+_{\text{inside}}$  across the apical membrane of larval *An. gambiae* midgut is approximately  $25\text{mmol l}^{-1}/10\text{mmol l}^{-1}$ ; the size of the  $\text{H}^+$  and amino acid gradients are unknown but they are assumed to be too small to drive the amino acid uptake. However, the  $-60$  to  $-120$  mV  $V_m$  [outside positive (D.Y.B. and W.R.H., unpublished data)] is equivalent to a 10- to 100-fold concentration gradient.  $\text{Na}^+$  concentration gradients are invariably discussed as energizers of epithelial membranes but the electrical gradients are often ignored. At scientific meetings, one

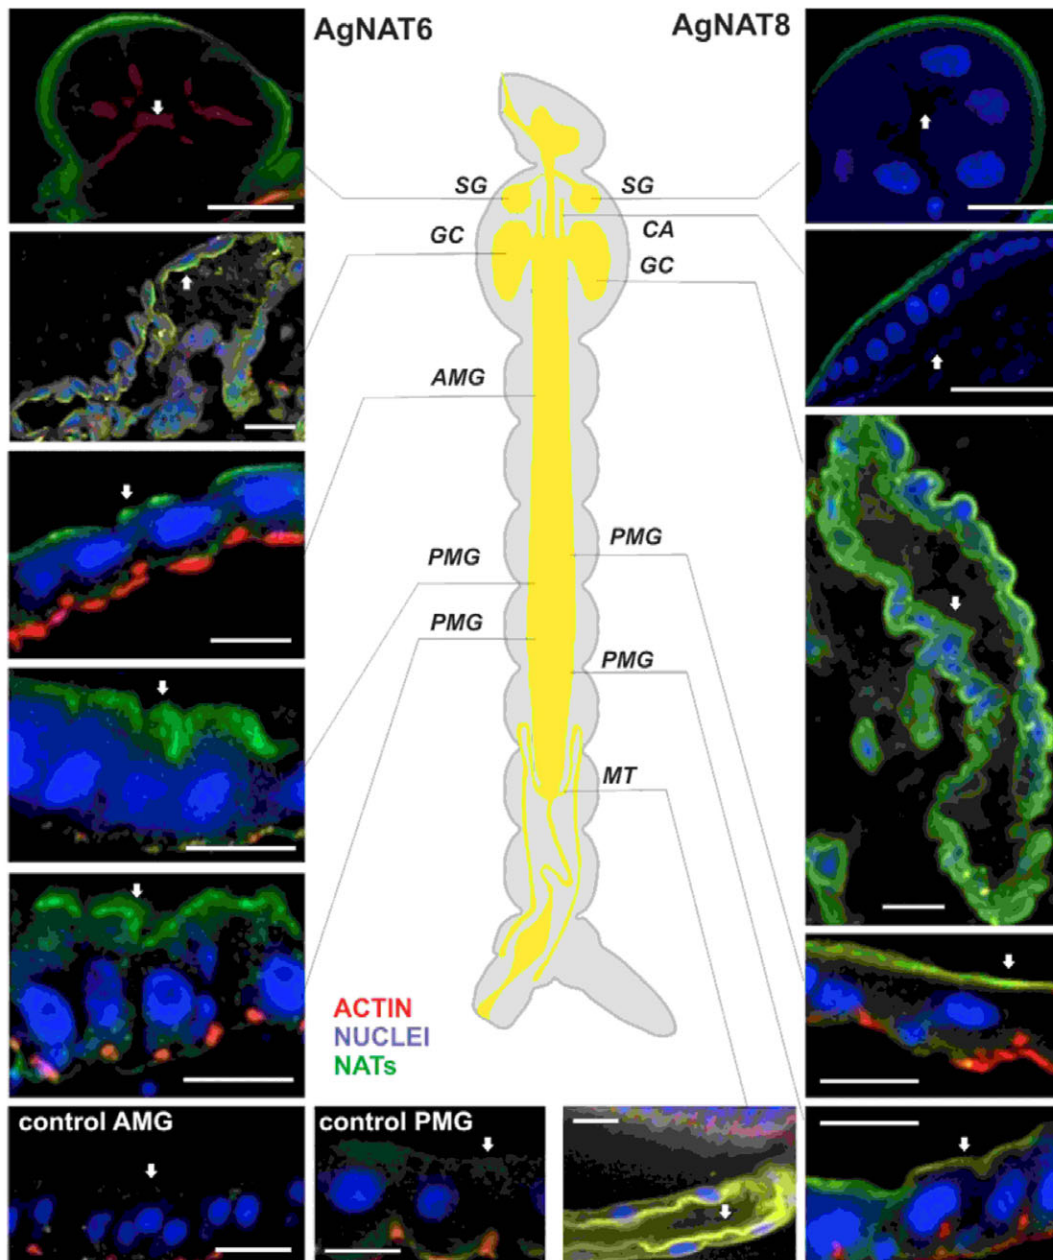

Fig. 6. Immunolabeling of *Anopheles gambiae* nutrient amino acid transporters (AgNATs) in frozen sections of the larval alimentary with epitope-specific purified antibodies (green channel) along with actin (TRITCPhalloidin, red channel) and nuclei (DRAQ-5, blue channel) viewed by confocal microscopy. Actin and nuclei were not visualized in a few sections to improve overall clarity. The red channel generally represents actin in the muscular envelope around the alimentary canal and corresponds to the location of the basal membrane except in salivary glands and Malpighian tubules where actin reveals the location of microvilli on the apical membrane. The location of the apical membrane is indicated by white arrows. Approximate positions of individual sections are shown at the insert diagram. Abbreviations are: SG, salivary gland; CA, cardia; GC, gastric caeca; AMG, anterior midgut; PMG, posterior midgut; MT, Malpighian tubules. Control sections of the AMG (control AMG) and PMG (control PMG) incubated with pre-bleed serum shown at the left bottom corner insert. Scale bar,  $50\ \mu\text{m}$  (Okech et al., 2008b).



often sees diagrams with H<sup>+</sup> V-ATPases located on a cell membrane without any indication of the magnitude or polarity of the voltage. Yet it is unlikely that metazoans would be the only taxa that rely solely on Na<sup>+</sup> gradients and fail to use voltage gradients for secondary ion transport, especially because all genomic metazoans possess primary electrogenic H<sup>+</sup> V-ATPases and numerous electrophoretic secondary transporters. The electrically coupled NHE<sub>VNAT</sub> pair can scarcely avoid playing a significant role in mosquito ion regulation as it is widely acknowledged to do in amino acid uptake.

It is widely accepted that the voltage generated by H<sup>+</sup> V-ATPases drives the symport of Na<sup>+</sup> stoichiometrically coupled to an amino acid into alimentary canal epithelial cells of many insects. As noted above, the amino acid uptake role of the symporters is emphasized with little attention paid to its Na<sup>+</sup> uptake role. Nevertheless, Na<sup>+</sup> uptake has four important consequences. (1) Removing Na<sup>+</sup> from the lumen allows the H<sup>+</sup> that is sequestered on the luminal face of the apical membrane by the H<sup>+</sup> V-ATPase to enter the bulk phase and de-alkalinize the lumen in the PMG. (2) Adding H<sup>+</sup> to the lumen and Na<sup>+</sup> to the cells removes metabolic acid from cells, complementing classical NHEs in this respect. (3) Removing Na<sup>+</sup> from the lumen would lower its concentration there and amino acid symport would stop. (4) Adding H<sup>+</sup> to the lumen and removing Na<sup>+</sup> would continue to acidify it. As the lumen and cells must be in an ionic steady state, these results imply that an additional transporter must be present. The postulated transporter should have the same orientation as the electrophoretic bacterial NHA, which uses the outside positive voltage generated by the electron transport system to drive 2H<sup>+</sup> into cells and Na<sup>+</sup> out.

Because *AgNHA1* is located in the same membranes as the H<sup>+</sup> V-ATPase and *AgNAT8* (see VAN in Fig. 8) (Rheault et al., 2007; Okech et al., 2008a) and because it is a distant relative of the NHAs in alkalophilic transporters (Brett et al., 2005), it is worth considering as a candidate for this role.

Speculation regarding V-ATPase, NAT, NHA (VAN) as a localized homeostatic trio

The preceding discussion has been based on data published in refereed journals. Here, we speculate on the implications of the data for ionic homeostasis. To make the case that *AgNHA1* is a candidate for the recycling role, consider alkalophilic bacteria as models. These distant relatives, like *AgNHA1*, face a highly alkaline environment (Krulwich et al., 1994). The bacterial antiporter expressed in *E. coli* as *EcNha1* (*E. coli* Na<sup>+</sup>/H<sup>+</sup> antiporter 1) is the most well-known cation exchanger; its crystal structure and mechanism of action have been explored in a series of brilliant studies (Hunte et al., 2005; Padan et al., 2005; Padan et al., 2009). Bacterial NHAs use the *V<sub>m</sub>* generated by the electron transport system to drive 1Na<sup>+</sup> out of cells and 2H<sup>+</sup> into them (Taglicht et al., 1993); thus, they act in the opposite direction from NHEs or NHE<sub>VNAT</sub>s and in the direction required of our candidate NHA. If *AgNHA1* functions like bacterial NHAs, it would fulfil the H<sup>+</sup> and Na<sup>+</sup> recycling role mentioned above.

The H<sup>+</sup> V-ATPase, *AgNAT8* and *AgNHA1* trio (VAN) is localized in the apical membrane of the epithelial cells in PMG of *An. gambiae* larvae (Fig. 8) (Rheault et al., 2007; Okech et al., 2008a) where the luminal pH is much lower than in anterior midgut (AMG). It is clear that the electrogenic H<sup>+</sup> V-ATPase drives H<sup>+</sup>

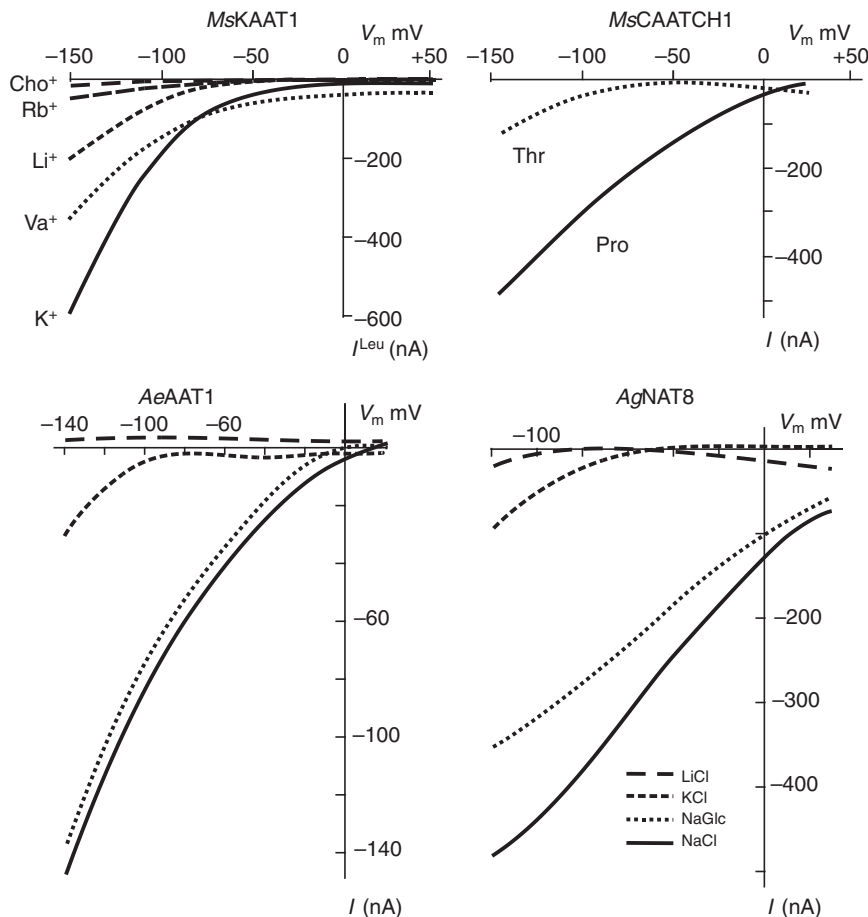

Fig. 7. Current/voltage (*I/V*) relationships of four (Na<sup>+</sup> or K<sup>+</sup>):amino acid<sup>±</sup> symporters (NATs). In all four cases the current is voltage dependent. In *Manduca sexta* K<sup>+</sup> amino acid transporter 1 (*MsKAAT1*) and *Aedes aegypti* amino acid transporter 1 (*AeAAT1*) the conductance is linear from 0 to ~-60 mV then increases at voltages more negative than -70 mV. These results demonstrate that all four NATs are voltage driven (electrophoretic): (A) *Manduca sexta* K<sup>+</sup> amino acid transporter 1 (*MsKAAT1*) (Castagna et al., 1998); (B) *M. sexta* cation amino acid transporter channel 1 (*MsCAATCH1*) (Feldman et al., 2000); (C) *Ae. aegypti* amino acid transporter 1 (*AeAAT1*) (Boudko et al., 2005a); (D) *An. gambiae* nutrient amino acid transporter 8 (*AgNAT8*) (Meleshkevitch et al., 2006).

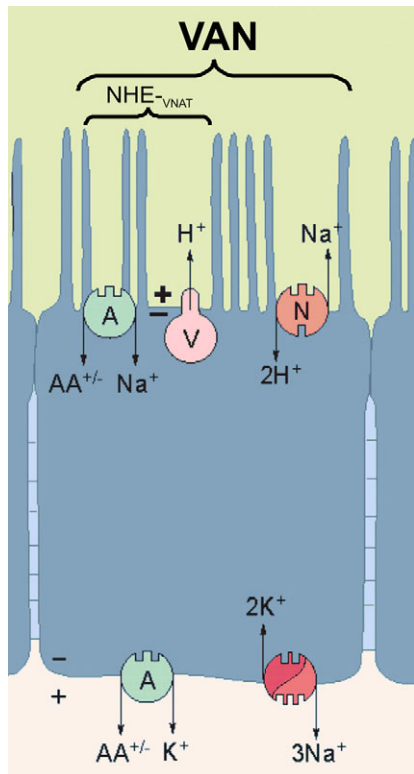

Fig. 8. An  $H^+$  V-ATPase (V) is electrically coupled by the membrane potential ( $V_m$ ) to AgNAT8, a  $Na^+$ :amino acid transporter (NAT; N) in the apical plasma membrane of posterior midgut (PMG) constituting an  $NHE_{VNAT}$ . AgNHA1, a  $Na^+/H^+$  Antiporter (NHA; A), is also present on the apical membrane. A  $Na^+/K^+$  ATPase is present in the basal membrane along with *Anopheles gambiae* nutrient amino acid transporter 6 (AgNAT6) (modified from Okech et al., 2008a; Okech et al., 2008b).

across the membrane's lipid bilayer and hyperpolarizes it. It is also clear that the electrophoretic  $NHE_{VNAT8}$  replaces lumen  $Na^+$  by  $H^+$  and de-alkalinizes it. As NATs constitute a major pathway for amino acid absorption, similar  $NHE_{VNAT}$  activity is expected to be widespread in insects if not in other metazoan organisms. Furthermore, it is tempting to speculate that in larval GC and PMG the outside positive voltage drives  $Na^+$  back out of the cells coupled to  $2H^+$  entry via the AgNHA1 that is located there (Okech et al., 2008a) completing the VAV trio. If these speculated properties of AgNHA1 are correct, then the presence of all three proteins in the apical membrane of both GC and PMG cells would provide an integrated mechanism for amino acid uptake, metabolic acid expulsion, lumen alkalization and de-alkalinization and  $Na^+$  recycling. Whether the midgut lumen is alkalized or de-alkalinized would depend on the relative activities of the NAT and NHA components. NHAs ( $Na^+$  out,  $2H^+$  in) would dominate in GC and the lumen would be alkalized; NATs ( $Na^+$  in,  $H^+$  out) would dominate in PMG and the lumen would be de-alkalinized. The primary energy source for these integrated mechanisms would be the trans-apical membrane potential generated from ATP hydrolysis via the  $H^+$  V-ATPase. Its value of  $\sim -60$  to  $-120$  mV ( $\cong 10^-$ , 100-fold  $\Delta$  concentration) would be sufficient to energize both electrophoretic NHAs and NATs whereas  $\Delta$  concentrations of  $Na^+$ ,  $H^+$  and amino acid $^\pm$  (neutral amino acid) are all much too small for this purpose.

This work was supported in part by Research Grants AI-52436 and AI-30464 from NIH and by funds from the Whitney Laboratory, the Emerging Pathogens Institute and the Department of Epidemiology and Biostatistics, University of Florida. We thank Dr Paul J. Linser for helpful discussions of the manuscript. Deposited in PMC for release after 12 months.

#### LIST OF ABBREVIATIONS

|                   |                                                                                                                                                                                                                             |
|-------------------|-----------------------------------------------------------------------------------------------------------------------------------------------------------------------------------------------------------------------------|
| <i>Ae</i> AAT1    | <i>Aedes aegypti</i> amino acid transporter 1 (also known as <i>Ae</i> AAT1i in the original publication and GenBank. Please note that a prefix indicates the genus and species of a donor; the suffix priority of cloning) |
| <i>Ae</i> NHE1    | <i>Aedes aegypti</i> $Na^+/H^+$ exchanger 1 [also known as <i>Ae</i> NHE8 in Pullikuth et al. (Pullikuth et al., 2006) terminology]                                                                                         |
| <i>Ae</i> NHE2    | <i>Aedes aegypti</i> $Na^+/H^+$ exchanger 2 [also known as <i>Ae</i> NHE3 in Pullikuth et al. (Pullikuth et al., 2006) terminology]                                                                                         |
| <i>Ag</i> NAT6    | <i>Anopheles gambiae</i> nutrient amino acid transporter 6                                                                                                                                                                  |
| <i>Ag</i> NAT8    | <i>Anopheles gambiae</i> nutrient amino acid transporter 8                                                                                                                                                                  |
| AMG               | anterior midgut                                                                                                                                                                                                             |
| BBMV              | brush-border membrane vesicle                                                                                                                                                                                               |
| EAAT              | excitatory amino acid transporter                                                                                                                                                                                           |
| <i>Ec</i> NhA1    | <i>E. coli</i> $Na^+/H^+$ antiporter 1                                                                                                                                                                                      |
| GABA              | $\gamma$ -amino butyric acid                                                                                                                                                                                                |
| GAT1              | $\gamma$ -amino butyric acid transporter                                                                                                                                                                                    |
| GC                | gastric caeca                                                                                                                                                                                                               |
| GCAM              | goblet cell apical membrane                                                                                                                                                                                                 |
| <i>Ms</i> CAATCH1 | <i>Manduca sexta</i> cation anion activated amino acid transporter channel 1                                                                                                                                                |
| <i>Ms</i> KAAT1   | <i>Manduca sexta</i> $K^+$ amino acid transporter 1                                                                                                                                                                         |
| MT                | Malpighian tubule                                                                                                                                                                                                           |
| NAT               | nutrient amino acid transporter                                                                                                                                                                                             |
| NHA               | $Na^+/H^+$ antiporter                                                                                                                                                                                                       |
| NHA1              | $Na^+/H^+$ antiporter 1                                                                                                                                                                                                     |
| NHA2              | $Na^+/H^+$ antiporter 2                                                                                                                                                                                                     |
| NHE               | $Na^+/H^+$ exchanger                                                                                                                                                                                                        |
| NTT               | neurotransmitter transporter                                                                                                                                                                                                |
| PMG               | posterior midgut                                                                                                                                                                                                            |
| SLC6              | solute carrier clade of amino acid transporters                                                                                                                                                                             |
| SLC9              | solute carrier 9 SLC clade of NHEs and NHAs                                                                                                                                                                                 |
| SNF               | sodium neurotransmitter symporter family                                                                                                                                                                                    |
| VAN               | V-ATPase-NAT-NHA residing in same membrane (a postulated mechanism for regulating pH and $Na^+$ concentrations in alimentary canal lumen and cells)                                                                         |
| $V_m$             | membrane potential (indicates the measured voltage across a membrane)                                                                                                                                                       |
| $\Delta\Psi$      | electrical potential difference [ $\Delta\Psi$ indicates the theoretical or calculated (thermodynamic) electrical potential of an ionic species]                                                                            |

#### References

- Bader, A. L., Parthasarathy, R. and Harvey, W. R. (1995). A novel proline, glycine:  $K^+$  symporter in midgut brush-border membrane vesicles from larval *Manduca sexta*. *J. Exp. Biol.* **198**, 2599-2607.
- Bossi, E., Centinaio, E., Castagna, M., Giovannardi, S., Vincenti, S., Sacchi, V. F. and Peres, A. (1999a). Ion binding and permeation through the lepidopteran amino acid transporter KAAT1 expressed in *Xenopus* oocytes. *J. Physiol.* **515**, 729-742.
- Bossi, E., Sacchi, V. F. and Peres, A. (1999b). Ionic selectivity of the coupled and uncoupled currents carried by the amino acid transporter KAAT1. *Pflugers Archiv: Eur. J. Physiol.* **438**, 788-796.
- Bossi, E., Vincenti, S., Sacchi, V. F. and Peres, A. (2000). Simultaneous measurements of ionic currents and leucine uptake at the amino acid cotransporter KAAT1 expressed in *Xenopus laevis* oocytes. *Biochim. Biophys. Acta* **1495**, 34-39.
- Boudko, D. Y., Kohn, A. B., Meleshkevitch, E. A., Dasher, M. K., Seron, T. J., Stevens, B. R. and Harvey, W. R. (2005a). Ancestry and progeny of nutrient amino acid transporters. *Proc. Natl. Acad. Sci. USA* **102**, 1360-1365.
- Boudko, D. Y., Stevens, B. R., Donly, B. C. and Harvey, W. R. (2005b). Nutrient amino acid and neurotransmitter transporters. In *Comprehensive Molecular Insect Science*, vol. 4 (ed. L. Gilbert, K. Iatrou and S. Gill), pp. 255-309. Amsterdam: Elsevier.
- Brett, C. L., Donowitz, M. and Rao, R. (2005). Evolutionary origins of eukaryotic sodium/proton exchangers. *Am. J. Physiol. Cell Physiol.* **288**, C223-C239.
- Castagna, M., Shayakul, C., Trotti, D., Sacchi, V. F., Harvey, W. R. and Hediger, M. A. (1997). Molecular characteristics of mammalian and insect amino acid transporters: implications for amino acid homeostasis. *J. Exp. Biol.* **200**, 269-286.

- Castagna, M., Shayakul, C., Trotti, D., Sacchi, V. F., Harvey, W. R. and Hediger, M. A. (1998). Cloning and characterization of a potassium-coupled amino acid transporter. *Proc. Natl. Acad. Sci. USA* **95**, 5395-5400.
- Castagna, M., Vincenti, S., Marciari, P. and Sacchi, V. F. (2002). Inhibition of the lepidopteran amino acid co-transporter KAAT1 by phenylglyoxal: role of arginine 76. *Insect Mol. Biol.* **11**, 283-289.
- Cioffi, M. and Wolfersberger, M. G. (1983). Isolation of separate apical, lateral and basal plasma membrane from cells of an insect epithelium: a procedure based on tissue organization and ultrastructure. *Tissue Cell* **15**, 781-803.
- Clements, A. N. (1992). *The Biology of Mosquitoes*. London: Chapman & Hall.
- Donly, B. C., Richman, A., Hawkins, E., McLean, H. and Caveney, S. (1997). Molecular cloning and functional expression of an insect high-affinity Na<sup>+</sup>-dependent glutamate transporter. *Eur. J. Biochem.* **248**, 535-542.
- Donly, C., Jevnikar, J., McLean, H. and Caveney, S. (2000). Substrate-stereoselectivity of a high-affinity glutamate transporter cloned from the CNS of the cockroach *Diploptera punctata*. *Insect Biochem. Mol. Biol.* **30**, 369-376.
- Dow, J. A. T. and Peacock, J. M. (1989). Microelectrode evidence for the electrical isolation of goblet cell cavities in *Manduca sexta* middle midgut. *J. Exp. Biol.* **143**, 101-114.
- Feldman, D. H., Harvey, W. R. and Stevens, B. R. (2000). A novel electrogenic amino acid transporter is activated by K<sup>+</sup> or Na<sup>+</sup>, is alkaline pH-dependent, and is Cl<sup>-</sup>-independent. *J. Biol. Chem.* **275**, 24518-24526.
- Gao, X., McLean, H., Caveney, S. and Cioffi, C. (1999). Molecular cloning and functional characterization of a GABA transporter from the CNS of the cabbage looper, *Trichoplusia ni*. *Insect Biochem. Mol. Biol.* **29**, 609-623.
- Gardiner, R. B., Ullensvang, K., Danbolt, N. C., Caveney, S. and Donly, B. C. (2002). Cellular distribution of a high-affinity glutamate transporter in the nervous system of the cabbage looper *Trichoplusia ni*. *J. Exp. Biol.* **205**, 2605-2614.
- Giordana, B. and Parenti, P. (1994). Determinants for the activity of the neutral amino acid/K<sup>+</sup> symport in lepidopteran larval midgut. *J. Exp. Biol.* **196**, 145-155.
- Giordana, B., Sacchi, V. F. and Hanozet, G. M. (1982). Intestinal amino acid absorption in Lepidopteran larvae. *Biochim. Biophys. Acta* **692**, 81-88.
- Giordana, B., Sacchi, V. F., Parenti, P. and Hanozet, G. M. (1989). Amino acid transport systems in intestinal brush-border membranes from lepidopteran larvae. *Am. J. Physiol.* **257**, R494-R500.
- Giordana, B., Leonardi, M. G., Casartelli, M., Consonni, P. and Parenti, P. (1998). K<sup>(+)</sup>-neutral amino acid symport of *Bombyx mori* larval midgut: a system operative in extreme conditions. *Am. J. Physiol.* **274**, R1361-R1371.
- Guastella, J., Nelson, N., Nelson, H., Czyzyk, L., Keynan, S., Miedel, M. C., Davidson, N., Lester, H. A. and Kanner, B. I. (1990). Cloning and expression of a rat brain GABA transporter. *Science* **249**, 1303-1306.
- Hanozet, G. M., Giordana, B. and Sacchi, V. F. (1980). K<sup>+</sup>-dependent phenylalanine uptake in membrane vesicles isolated from the midgut of *Philosamia cynthia* larvae. *Biochim. Biophys. Acta* **596**, 481-486.
- Harvey, W. R. (1992). Physiology of V-ATPases. *J. Exp. Biol.* **172**, 1-17.
- Harvey, W. R., Cioffi, M., Dow, J. A. and Wolfersberger, M. G. (1983). Potassium ion transport ATPase in insect epithelia. *J. Exp. Biol.* **106**, 91-117.
- Hennigan, B. B. and Wolfersberger, M. G. (1989). Intestinal amino acid absorption in tobacco hornworm larvae is stimulated by potassium and sodium but not rubidium or lithium. *Arch. Insect Biochem. Physiol.* **11**, 21-28.
- Hennigan, B. B., Wolfersberger, M. G. and Harvey, W. R. (1993a). Neutral amino acid symport in larval *Manduca sexta* midgut brush-border membrane vesicles deduced from cation-dependent uptake of leucine, alanine, and phenylalanine. *Biochim. Biophys. Acta* **1148**, 216-222.
- Hennigan, B. B., Wolfersberger, M. G., Parthasarathy, R. and Harvey, W. R. (1993b). Cation-dependent leucine, alanine, and phenylalanine uptake at pH 10 in brush-border membrane vesicles from larval *Manduca sexta* midgut. *Biochim. Biophys. Acta* **1148**, 209-215.
- Hunte, C., Screpanti, E., Venturi, M., Rimon, A., Padan, E. and Michel, H. (2005). Structure of a Na<sup>+</sup>/H<sup>+</sup> antiporter and insights into mechanism of action and regulation by pH. *Nature* **435**, 1197-1202.
- Kang'ethe, W., Aimanova, K. G., Pullikuth, A. K. and Gill, S. S. (2007). NHE8 mediates amiloride-sensitive Na<sup>+</sup>/H<sup>+</sup> exchange across mosquito Malpighian tubules and catalyzes Na<sup>+</sup> and K<sup>+</sup> transport in reconstituted proteoliposomes. *Am. J. Physiol. Renal. Physiol.* **292**, F1501-F1512.
- Krulwich, T. A., Cheng, J. and Guffanti, A. A. (1994). The role of monovalent cation/proton antiporters in Na<sup>(+)</sup>-resistance and pH homeostasis in *Bacillus*: an alkaliphile versus a neutralophile. *J. Exp. Biol.* **196**, 457-470.
- Leonardi, M. G., Casartelli, M., Fiandra, L., Parenti, P. and Giordana, B. (2001a). Role of specific activators of intestinal amino acid transport in *Bombyx mori* larval growth and nutrition. *Arch. Insect Biochem. Physiol.* **48**, 190-198.
- Leonardi, M. G., Fiandra, L., Casartelli, M., Cappellozza, S. and Giordana, B. (2001b). Modulation of leucine absorption in the larval midgut of *Bombyx mori* (Lepidoptera, Bombycidae). *Comp. Biochem. Physiol., Part A Mol. Integr. Physiol.* **129**, 665-672.
- Liu, Z. and Harvey, W. R. (1996a). Arginine uptake through a novel cationic amino acid:K<sup>+</sup> symporter, System R<sub>+</sub>, in brush border membrane vesicles from larval *Manduca sexta* midgut. *Biochim. Biophys. Acta* **1282**, 25-31.
- Liu, Z. and Harvey, W. R. (1996b). Cationic lysine uptake by System R<sub>+</sub> and zwitterionic lysine uptake by System B in brush border membrane vesicles from larval *Manduca sexta* midgut. *Biochim. Biophys. Acta* **1282**, 32-38.
- Liu, Z., Stevens, B. R., Feldman, D. H., Hediger, M. A. and Harvey, W. R. (2003). K<sup>+</sup> amino acid transporter KAAT1 mutant Y147F has increased transport activity and altered substrate selectivity. *J. Exp. Biol.* **206**, 245-254.
- Mandel, L. J., Moffett, D. F. and Jobsis, F. F. (1975). Redox state of respiratory chain enzymes and potassium transport in silkworm mid-gut. *Biochim. Biophys. Acta* **408**, 123-134.
- Mbungu, D., Ross, L. S. and Gill, S. S. (1995). Cloning, functional expression, and pharmacology of a GABA transporter from *Manduca sexta*. *Arch. Biochem. Biophys.* **318**, 489-497.
- Meleshkevitch, E. A., Assis-Nascimento, P., Popova, L. B., Miller, M. M., Kohn, A. B., Phung, E. N., Mandal, A., Harvey, W. R. and Boudko, D. Y. (2006). Molecular characterization of the first aromatic nutrient transporter from the sodium neurotransmitter symporter family. *J. Exp. Biol.* **209**, 3183-3198.
- Murer, H., Hopfer, U. and Kinne, R. (1976). Sodium/proton antiport in brush-border membrane vesicles isolated from rat small intestine and kidney. *Biochem. J.* **154**, 597-604.
- Nedergaard, S. (1972a). Active transport of  $\alpha$ -aminoisobutyric acid by the isolated midgut of *hyalophora cecropia*. *J. Exp. Biol.* **56**, 167-172.
- Nedergaard, S. (1972b). Transport of amino acids in *cecropia* midgut. In *Ussing HH, Thorn NA: Transp Mech in Epithelia* (ed. H. H. Ussing and N. A. Thorn), pp. 372-391. New York: Academic Press.
- Nelson, N. and Harvey, W. R. (1999). Vacuolar and plasma membrane proton-adenosinetriphosphatases. *Physiol. Rev.* **79**, 361-385.
- Okech, B. A., Boudko, D. Y., Linser, P. J. and Harvey, W. R. (2008a). Cationic pathway of pH regulation in larvae of *Anopheles gambiae*. *J. Exp. Biol.* **211**, 957-968.
- Okech, B. A., Meleshkevitch, E. A., Miller, M. M., Popova, L. B., Harvey, W. R. and Boudko, D. Y. (2008b). Synergy and specificity of two Na<sup>+</sup>-aromatic amino acid symporters in the model alimentary canal of mosquito larvae. *J. Exp. Biol.* **211**, 1594-1602.
- Orlowski, J. and Grinstein, S. (2004). Diversity of the mammalian sodium/proton exchanger SLC9 gene family. *Pflügers Arch.* **447**, 549-565.
- Oschman, J. L. and Berridge, M. J. (1971). The structural basis of fluid secretion. *Fed. Proc.* **30**, 49-56.
- Padan, E., Bibi, E., Ito, M. and Krulwich, T. A. (2005). Alkaline pH homeostasis in bacteria: new insights. *Biochim. Biophys. Acta* **1717**, 67-88.
- Padan, E., Kozachkov, L., Herz, K. and Rimon, A. (2009). NHA crystal structure, functional-structural insights. *J. Exp. Biol.* (in press).
- Parenti, P., Forcella, M., Pugliese, A., Casartelli, M., Giordana, B., Leonardi, M. G. and Hanozet, G. M. (2000). Substrate specificity of the brush border K<sup>+</sup>-leucine symport of *Bombyx mori* larval midgut. *Insect Biochem. Mol. Biol.* **30**, 243-252.
- Patrick, M. L., Aimanova, K., Sanders, H. R. and Gill, S. S. (2006). P-type Na<sup>+</sup>/K<sup>+</sup>-ATPase and V-type H<sup>+</sup>-ATPase expression patterns in the osmoregulatory organs of larval and adult mosquito *Aedes aegypti*. *J. Exp. Biol.* **209**, 4638-4651.
- Peres, A. and Bossi, E. (2000). Effects of pH on the uncoupled, coupled and pre-steady-state currents at the amino acid transporter KAAT1 expressed in *Xenopus oocytes*. *J. Physiol.* **525**, 83-89.
- Pullikuth, A. K., Aimanova, K., Kang'ethe, W., Sanders, H. R. and Gill, S. S. (2006). Molecular characterization of sodium/proton exchanger 3 (NHE3) from the yellow fever vector, *Aedes aegypti*. *J. Exp. Biol.* **209**, 3529-3544.
- Quick, M. and Stevens, B. R. (2001). Amino acid transporter CAATCH1 is also an amino acid-gated cation channel. *J. Biol. Chem.* **276**, 33413-33418.
- Reuveni, M., Hong, Y., Dunn, P. and Neal, J. (1993). Leucine transport into brush border membrane vesicles from guts of lepidoptera decemlineata and *Manduca sexta*. *Comp. Biochem. Physiol. A* **104**, 267-272.
- Rheault, M. R., Okech, B. A., Keen, S. B., Miller, M. M., Meleshkevitch, E. A., Linser, P. J., Boudko, D. Y. and Harvey, W. R. (2007). Molecular cloning, phylogeny and localization of AgNHA1: the first Na<sup>+</sup>/H<sup>+</sup> antiporter (NHA) from a metazoan, *Anopheles gambiae*. *J. Exp. Biol.* **210**, 3848-3861.
- Sardet, C., Franchi, A. and Pouyssegur, J. (1989). Molecular cloning, primary structure, and expression of the human growth factor-activatable Na<sup>+</sup>/H<sup>+</sup> antiporter. *Cell* **56**, 271-280.
- Seal, R. P., Daniels, G. M., Wolfgang, W. J., Forte, M. A. and Amara, S. G. (1998). Identification and characterization of a cDNA encoding a neuronal glutamate transporter from *Drosophila melanogaster*. *Recept. Channels* **6**, 51-64.
- Soragna, A., Mari, S. A., Pisani, R., Peres, A., Castagna, M., Sacchi, V. F. and Bossi, E. (2004). Structural domains involved in substrate selectivity in two neutral amino acid transporters. *Am. J. Physiol. Cell Physiol.* **287**, C754-C761.
- Taglicht, D., Padan, E. and Schuldiner, S. (1993). Proton-sodium stoichiometry of NhaA, an electrogenic antiporter from *Escherichia coli*. *J. Biol. Chem.* **268**, 5382-5387.
- Umesh, A., Cohen, B. N., Ross, L. S. and Gill, S. S. (2003). Functional characterization of a glutamate/aspartate transporter from the mosquito *Aedes aegypti*. *J. Exp. Biol.* **206**, 2241-2255.
- Vincenti, S., Castagna, M., Peres, A. and Sacchi, V. F. (2000). Substrate selectivity and pH dependence of KAAT1 expressed in *Xenopus laevis* oocytes. *J. Membr. Biol.* **174**, 213-224.
- Wieczorek, H., Weerth, S., Schindlbeck, M. and Klein, U. (1989). A vacuolar-type proton pump in a vesicle fraction enriched with potassium transporting plasma membranes from tobacco hornworm midgut. *J. Biol. Chem.* **264**, 11143-11148.
- Wieczorek, H., Cioffi, M., Klein, U., Harvey, W. R., Schweikl, H. and Wolfersberger, M. G. (1990). Isolation of goblet cell apical membrane from tobacco hornworm midgut and purification of its vacuolar-type ATPase. *Methods Enzymol.* **192**, 608-616.
- Wolfersberger, M. G. (2000). Amino acid transport in insects. *Annu. Rev. Entomol.* **45**, 111-120.
- Wolfersberger, M. G., Spaeth, D. D. and Harvey, W. R. (1987). Comparison of detergent-solubilized and membrane-bound Cation-stimulated ATPase from tobacco hornworm midgut. *Physiologist* **30**, 157.
- Zhuang, Z., Linser, P. J. and Harvey, W. R. (1999). Antibody to H<sup>(+)</sup> V-ATPase subunit E colocalizes with portosomes in alkaline larval midgut of a freshwater mosquito (*Aedes aegypti*). *J. Exp. Biol.* **202**, 2449-2460.
